# Supplementary material
Source: publisher site journal article supplement (https://www.dovepress.com/article/527880)

**Supplementary Table 1.** Treatment details of each group

**Supplementary Table 2.** Primary and secondary outcomes after treatment (per-protocol analysis)

**Supplementary Table 3.** Primary and secondary outcomes after treatment (ANCOVA, multiple imputation)

**Supplementary Table 4.** Primary and secondary outcomes after treatment (ANCOVA, LOCF)

**Supplementary Table 5.** Areas under the curves of outcomes at 25 weeks

**Supplementary Table 6.** Survival analysis (Cox-regression)

**Supplementary Table 7.** Summary of treatment-related adverse events

**Supplementary Figure 1.** An example of a procedural image for pharmacopouncture therapy

**Supplementary Table 1.** Treatment details of each group

| **Intervention type** | **n (%)** | **Number of treatments per patient** | | **Volume per treatment (ml)** | |
| --- | --- | --- | --- | --- | --- |
| **Mean ± SD** | **Median [IQR]** | **Mean ± SD** | **Median [IQR]** |
| **Pharmacopuncture** | 29 (100.0) |  |  |  |  |
| Pharmacopuncture |  |  |  |  |  |
| Shinbaro2 | 21 (72.4) | 8.2 ± 5.5 | 9 [4–12] | 32.2 ± 3.5 | 31.5 [29.75–33.75] |
| Shinbaro3 | 12 (41.4) | 8.4 ± 3.4 | 7 [5.75–12] | 18.8 ± 5.9 | 20 [14–22] |
| Hangryunhaedok–tang | 11 (37.9) | 5.1 ± 3.9 | 5 [2.5 – 6] | 6.2 ± 4.2 | 6 [2.75–6.5] |
| Jungsongouhyul | 6 (20.7) | 4.8 ± 5.6 | 1.5 [1–9.5] | 2.3 ± 0.9 | 2 [1.75–2.325] |
| Hominis placenta | 5 (17.2) | 12.4 ± 6.2 | 13 [9–16] | 9.2 ± 5.2 | 11 [5–12] |
| Bee Venom | 6 (20.7) | 6.5 ± 4.7 | 6 [3–10.5] | 2.4 ± 0.5 | 2.5 [2.15–2.8] |
| Shinbaro1 | 1 (3.4) | 1 ± NA | 1 [1–1] | 3 ± NA | 3 [3–3] |
| Unknown | 3 (10.3) | 6.3 ± 2.1 | 7 [5.5–7.5] | 2.9 ± 1.1 | 3.2 [2.45–3.2] |
| Acupoints |  |  |  |  |  |
| GB20 (風池) | 20 (69) | 10.3 ± 3.5 | 12 [11–12] |  |  |
| GB21 (肩井) | 14 (48.3) | 9.3 ± 4.1 | 12 [9–12] |  |  |
| EX (Cervical Hyeopcheok, 夾脊) | 13 (44.8) | 9.1 ± 4 | 11 [5–12] |  |  |
| SI14 (肩外兪) | 11 (37.9) | 11 ± 2.2 | 12 [11.5–12] |  |  |
| SI15 (肩中兪) | 10 (34.5) | 11 ± 2.2 | 12 [11.25–12] |  |  |
| GV16 (風府) | 11 (37.9) | 11 ± 2.3 | 12 [12–12] |  |  |
| GV14 (大椎) | 7 (24.1) | 11.8 ± 0.4 | 12 [12–12] |  |  |
| LI17 (天鼎) | 4 (13.8) | 8.8 ± 5.1 | 8.5 [6–11.25] |  |  |
| Facet joint | 3 (10.3) | 12 ± 0 | 12 [12–12] |  |  |
| Ashi point (阿是穴) | 3 (10.3) | 8.3 ± 5.5 | 11 [6.5–11.5] |  |  |
| ETC | 9 (31) | 13.2 ± 11.3 | 12 [4–19.5] |  |  |
| **Acupuncture** | 29 (100.0) |  |  |  |  |
| Acupoints |  |  |  |  |  |
| GB20 (風池) | 23 (79.3) | 10.7 ± 2.9 | 12 [10.5–12] |  |  |
| GB21 (肩井) | 22 (75.9) | 10.7 ± 2.9 | 12 [11–12] |  |  |
| GV16 (風府) | 17 (58.6) | 11 ± 2.2 | 12 [11–12] |  |  |
| SI15 (肩中兪) | 12 (41.4) | 11.5 ± 0.8 | 12 [ 11–12] |  |  |
| EX (Cervical Hyeopcheok, 夾脊) | 11 (37.9) | 10.9 ± 1.1 | 11 [10–12] |  |  |
| SI14 (肩外兪) | 9 (31) | 11.6 ± 0.7 | 12 [11–12] |  |  |
| TE14 (肩髎) | 9 (31) | 11.6 ± 0.9 | 12 [12–12] |  |  |
| LI11 (曲池) | 5 (17.2) | 11.4 ± 0.9 | 12 [11–12] |  |  |
| BL10 (天柱) | 8 (27.6) | 11.8 ± 0.7 | 12 [12–12] |  |  |
| ETC | 11 (37.9) | 21.9 ± 22.8 | 12 [11–23.5] |  |  |
| **Usual care** | 26 (100.0) |  |  |  |  |
| **Physical therapy** |  |  |  |  |  |
| Interferential Current Therapy | 19 (73.1) | 10.8 ± 2.4 | 12 [10.5–12] |  |  |
| Ultrasound | 14 (53.8) | 11.7 ± 0.6 | 12 [11.25–12] |  |  |
| TENS | 7 (26.9) | 11.1 ± 2.7 | 12 [10.5–12] |  |  |
| Laser therapy | 5 (19.2) | 11.6 ± 0.9 | 12 [12–12] |  |  |
| Hot pack | 3 (11.5) | 10 ± 1 | 10 [9.5–10.5] |  |  |
| ESWT | 2 (7.7) | 5 ± 1.4 | 5 [4.5–5.5] |  |  |
| Traction | 2 (7.7) | 7 ± 5.7 | 7 [5–9] |  |  |
| **Medication** |  |  |  |  |  |
| Arobest Tab (M03BX: OTHER CENTRALLY ACTING AGENTS) | 2 (7.7) | 2 Tabs/day, 20 mg/tab, total 7 d | | | |
| Almagel Tab (A02AD03: ALMAGATE) | 2 (7.7) | 2 Tabs/day, 500 mg/tab, total 7 d | | | |
| Airtal Tab (M01AB16: ACECLOFENAC) | 2 (7.7) | 2 Tabs/day, 100 mg/tab, total 7 d | | | |
| Ultracet Semi Tab (N02AJ13: TRAMADOL AND PARACETAMOL) | 2 (7.7) | 2 Tabs/day, 18.75 mg/tab, total 7 d | | | |

TENS, Transcutaneous electrical nerve stimulation; ESWT, Extracorporeal shock wave therapy

**Supplementary Table 2.** Primary and secondary outcomes after treatment (per-protocol analysis)

|  |  | Week 7 | Week 13 | Week 25 |
| --- | --- | --- | --- | --- |
| **NRS of neck pain** | Phm-Acu | 2.33 (1.78, 2.88) | 2.49 (1.94, 3.04) | 2.61 (2.06, 3.16) |
|  | Acu | 4.04 (3.51, 4.57) | 4.24 (3.71, 4.76) | 4.02 (3.49, 4.54) |
|  | UC | 5.06 (4.52, 5.60) | 5.18 (4.64, 5.72) | 4.58 (4.04, 5.12) |
|  | Difference (Phm-Acu vs. Acu) | 1.71 (0.82, 2.59) | 1.75 (0.86, 2.63) | 1.40 (0.52, 2.29) |
|  | Difference (Phm-Acu vs. UC) | 2.73 (1.84, 3.62) | 2.69 (1.80, 3.58) | 1.97 (1.08, 2.86) |
|  | *P* value (Phm-Acu vs. Acu) | <0.001*** | <0.001*** | <0.001*** |
|  | *P* value (Phm-Acu vs. UC) | <0.001*** | <0.001*** | <0.001*** |
| **NRS of arm pain** | Phm-Acu | 1.73 (1.08, 2.37) | 1.61 (0.96, 2.25) | 1.77 (1.12, 2.41) |
|  | Acu | 2.77 (2.14, 3.40) | 3.24 (2.62, 3.86) | 3.61 (2.99, 4.23) |
|  | UC | 4.24 (3.59, 4.88) | 4.72 (4.07, 5.36) | 3.56 (2.91, 4.20) |
|  | Difference (Phm-Acu vs. Acu) | 1.04 (0.00, 2.08) | 1.63 (0.60, 2.67) | 1.84 (0.81, 2.88) |
|  | Difference (Phm-Acu vs. UC) | 2.51 (1.47, 3.55) | 3.11 (2.07, 4.15) | 1.79 (0.75, 2.83) |
|  | *P* value (Phm-Acu vs. Acu) | 0.049* | <0.001*** | <0.001*** |
|  | *P* value (Phm-Acu vs. UC) | <0.001*** | <0.001*** | <0.001*** |
| **VAS of neck pain** | Phm-Acu | 23.63 (18.03, 29.23) | 26.52 (19.36, 33.68) | 23.75 (16.34, 31.17) |
|  | Acu | 38.61 (33.19, 44.04) | 35.28 (28.63, 41.93) | 38.65 (30.19, 47.11) |
|  | UC | 49.81 (44.26, 55.35) | 48.69 (41.80, 55.59) | 43.74 (37.18, 50.29) |
|  | Difference (Phm-Acu vs. Acu) | 14.98 (5.97, 24.00) | 8.76 (-2.49, 20.01) | 14.90 (1.97, 27.82) |
|  | Difference (Phm-Acu vs. UC) | 26.18 (17.13, 35.22) | 22.17 (10.78, 33.57) | 19.98 (8.64, 31.33) |
|  | *P* value (Phm-Acu vs. Acu) | <0.001*** | 0.161 | 0.020* |
|  | *P* value (Phm-Acu vs. UC) | <0.001*** | <0.001*** | <0.001*** |
| **VAS of arm pain** | Phm-Acu | 17.67 (11.54, 23.80) | 15.39 (7.46, 23.32) | 17.23 (9.00, 25.45) |
|  | Acu | 27.85 (21.85, 33.84) | 32.94 (25.55, 40.34) | 40.40 (30.95, 49.85) |
|  | UC | 41.49 (35.39, 47.59) | 43.04 (35.38, 50.69) | 32.02 (24.76, 39.29) |
|  | Difference (Phm-Acu vs. Acu) | 10.17 (0.28, 20.06) | 17.55 (5.08, 30.02) | 23.17 (8.79, 37.55) |
|  | Difference (Phm-Acu vs. UC) | 23.82 (13.92, 33.72) | 27.65 (15.03, 40.26) | 14.80 (2.24, 27.35) |
|  | *P* value (Phm-Acu vs. Acu) | 0.043* | 0.003** | <0.001*** |
|  | *P* value (Phm-Acu vs. UC) | <0.001*** | <0.001*** | 0.017* |
| **NDI** | Phm-Acu | 19.32 (14.66, 23.98) | 19.40 (14.74, 24.06) | 17.48 (12.82, 22.14) |
|  | Acu | 22.01 (17.53, 26.50) | 20.32 (15.87, 24.77) | 20.98 (16.53, 25.43) |
|  | UC | 30.89 (26.29, 35.48) | 28.96 (24.36, 33.56) | 25.19 (20.59, 29.79) |
|  | Difference (Phm-Acu vs. Acu) | 2.70 (-4.79, 10.19) | 0.92 (-6.54, 8.38) | 3.50 (-3.96, 10.96) |
|  | Difference (Phm-Acu vs. UC) | 11.57 (4.04, 19.10) | 9.56 (2.03, 17.09) | 7.71 (0.18, 15.24) |
|  | *P* value (Phm-Acu vs. Acu) | 0.83 | 1 | 0.577 |
|  | *P* value (Phm-Acu vs. UC) | 0.001** | 0.009** | 0.044* |
| **NPQ** | Phm-Acu | 23.77 (18.65, 28.90) | 23.09 (17.97, 28.22) | 22.26 (17.13, 27.38) |
|  | Acu | 27.64 (22.74, 32.55) | 25.40 (20.54, 30.27) | 24.91 (20.05, 29.78) |
|  | UC | 35.26 (30.24, 40.28) | 34.07 (29.04, 39.09) | 31.87 (26.85, 36.90) |
|  | Difference (Phm-Acu vs. Acu) | 3.87 (-4.38, 12.12) | 2.31 (-5.90, 10.53) | 2.66 (-5.56, 10.87) |
|  | Difference (Phm-Acu vs. UC) | 11.49 (3.20, 19.78) | 10.97 (2.69, 19.26) | 9.61 (1.33, 17.90) |
|  | *P* value (Phm-Acu vs. Acu) | 0.577 | 1 | 0.928 |
|  | *P* value (Phm-Acu vs. UC) | 0.004** | 0.007** | 0.019* |
| **EQ-5D-5L** | Phm-Acu | 0.81 (0.77, 0.84) | 0.82 (0.78, 0.86) | 0.82 (0.78, 0.86) |
|  | Acu | 0.79 (0.76, 0.83) | 0.81 (0.77, 0.84) | 0.79 (0.76, 0.83) |
|  | UC | 0.75 (0.72, 0.79) | 0.75 (0.72, 0.79) | 0.77 (0.73, 0.81) |
|  | Difference (Phm-Acu vs. Acu) | -0.02 (-0.08, 0.04) | -0.01 (-0.07, 0.05) | -0.03 (-0.09, 0.03) |
|  | Difference (Phm-Acu vs. UC) | -0.05 (-0.11, 0.01) | -0.07 (-0.13, -0.01) | -0.05 (-0.11, 0.01) |
|  | *P* value (Phm-Acu vs. Acu) | 1 | 1 | 0.633 |
|  | *P* value (Phm-Acu vs. UC) | 0.089 | 0.028* | 0.146 |
| **SF-12 (PCS)** | Phm-Acu | 49.29 (46.97, 51.61) | 46.93 (44.61, 49.25) | 47.34 (45.02, 49.66) |
|  | Acu | 47.12 (44.87, 49.37) | 47.50 (45.28, 49.73) | 46.58 (44.36, 48.81) |
|  | UC | 44.14 (41.83, 46.44) | 42.82 (40.52, 45.13) | 45.44 (43.13, 47.74) |
|  | Difference (Phm-Acu vs. Acu) | -2.18 (-5.90, 1.54) | 0.57 (-3.13, 4.27) | -0.75 (-4.45, 2.95) |
|  | Difference (Phm-Acu vs. UC) | -5.15 (-8.91, -1.40) | -4.11 (-7.86, -0.36) | -1.90 (-5.65, 1.85) |
|  | *P* value (Phm-Acu vs. Acu) | 0.374 | 1 | 1 |
|  | *P* value (Phm-Acu vs. UC) | 0.005** | 0.029* | 0.506 |
| **SF-12 (MCS)** | Phm-Acu | 49.98 (46.88, 53.09) | 51.79 (48.69, 54.89) | 51.76 (48.65, 54.86) |
|  | Acu | 47.78 (44.76, 50.81) | 48.95 (45.95, 51.94) | 48.99 (45.99, 51.98) |
|  | UC | 48.75 (45.64, 51.86) | 48.16 (45.05, 51.28) | 49.15 (46.04, 52.27) |
|  | Difference (Phm-Acu vs. Acu) | -2.20 (-7.17, 2.77) | -2.85 (-7.79, 2.10) | -2.77 (-7.71, 2.18) |
|  | Difference (Phm-Acu vs. UC) | -1.23 (-6.27, 3.80) | -3.63 (-8.66, 1.41) | -2.60 (-7.64, 2.43) |
|  | *P* value (Phm-Acu vs. Acu) | 0.633 | 0.388 | 0.413 |
|  | *P* value (Phm-Acu vs. UC) | 1 | 0.209 | 0.486 |
| **PGIC** | Phm-Acu | 1.96 (1.62, 2.30) | 2.32 (1.98, 2.66) | 2.28 (1.94, 2.62) |
|  | Acu | 2.69 (2.35, 3.02) | 2.93 (2.59, 3.26) | 3.07 (2.74, 3.41) |
|  | UC | 3.04 (2.70, 3.38) | 3.36 (3.02, 3.70) | 3.00 (2.66, 3.34) |
|  | Difference (Phm-Acu vs. Acu) | 0.73 (0.18, 1.28) | 0.61 (0.06, 1.15) | 0.79 (0.25, 1.34) |
|  | Difference (Phm-Acu vs. UC) | 1.08 (0.52, 1.64) | 1.04 (0.48, 1.60) | 0.72 (0.16, 1.28) |
|  | *P* value (Phm-Acu vs. Acu) | 0.007** | 0.027* | 0.003** |
|  | *P* value (Phm-Acu vs. UC) | <0.001*** | <0.001*** | 0.008** |

Between-group differences were analyzed via analysis of covariance with adjustments for the baseline values, except the patient's global impression of change. The primary endpoint was the outcome at week 7. Missing values were added through a mixed model for repeated measures. Estimates for each group, and between-group differences, in the decrease at each time point are displayed with the 95% confidence intervals (CIs). The NRS, VAS, EQ-5D-5L, SF-12, and PGIC were measured as scores. The NDI and NPQ were calculated as percentages. *P <.05, **P <.01, ***P <.001. The p-values were adjusted using the Bonferroni correction.

***Phm-Acu***, pharmacopuncture; ***Acu,*** acupuncture; ***UC,*** usual care (medication & physiotherapy); ***NRS,*** numeric rating scale; ***VAS,*** visual-analogue scale; ***NDI,*** *n*eck disability index; ***NPQ,*** Northwick Park questionnaire; ***EQ-5D***-***5L,*** EuroQol 5-dimension 5-level instrument; ***SF-12,*** 12-item short form health survey; ***PCS,*** physical component summary; ***MCS,*** mental component summary; ***PGIC,*** patient global impression of change.

**Supplementary Table 3.** Primary and secondary outcomes after treatment (ANCOVA, multiple imputation)

|  |  | Week 7 | Week 13 | Week 25 |
| --- | --- | --- | --- | --- |
| **NRS of neck pain** | Phm-Acu | 2.49 (1.84 - 3.14) | 2.52 (1.83 - 3.20) | 2.47 (1.75 - 3.19) |
|  | Acu | 3.84 (3.13 - 4.55) | 4.14 (3.43 - 4.84) | 3.96 (3.19 - 4.74) |
|  | UC | 5.01 (4.33 - 5.68) | 5.14 (4.43 - 5.85) | 4.55 (3.79 - 5.31) |
|  | Difference (Phm-Acu vs. Acu) | 1.35 (0.20 - 2.49) | 1.62 (0.46 - 2.78) | 1.49 (0.26 - 2.72) |
|  | Difference (Phm-Acu vs. UC) | 2.51 (1.42 - 3.61) | 2.62 (1.48 - 3.77) | 2.08 (0.87 - 3.29) |
|  | *P* value (Phm-Acu vs. Acu) | 0.017* | 0.004** | 0.014* |
|  | *P* value (Phm-Acu vs. UC) | <0.001*** | <0.001*** | <0.001*** |
| **NRS of arm pain** | Phm-Acu | 1.84 (1.11 - 2.56) | 1.55 (0.82 - 2.27) | 1.80 (1.00 - 2.59) |
|  | Acu | 2.71 (1.94 - 3.48) | 3.12 (2.38 - 3.86) | 3.46 (2.61 - 4.31) |
|  | UC | 4.24 (3.47 - 5.01) | 4.69 (3.90 - 5.47) | 3.57 (2.73 - 4.41) |
|  | Difference (Phm-Acu vs. Acu) | 0.87 (-0.36 - 2.10) | 1.57 (0.37 - 2.78) | 1.66 (0.30 - 3.02) |
|  | Difference (Phm-Acu vs. UC) | 2.40 ( 1.20 - 3.61) | 3.14 (1.91 - 4.36) | 1.77 (0.44 - 3.11) |
|  | *P* value (Phm-Acu vs. Acu) | 0.222 | 0.008** | 0.013* |
|  | *P* value (Phm-Acu vs. UC) | <0.001*** | <0.001*** | 0.007** |
| **VAS of neck pain** | Phm-Acu | 24.92 (18.27 - 31.56) | 26.26 (14.09 - 38.43) | 28.97 (17.15 - 40.78) |
|  | Acu | 37.41 (30.13 - 44.68) | 37.42 (23.57 - 51.26) | 40.53 (28.54 - 52.52) |
|  | UC | 49.62 (42.62 - 56.63) | 45.98 (29.93 - 62.03) | 42.51 (31.47 - 53.56) |
|  | Difference (Phm-Acu vs. Acu) | 12.49 ( 1.23 - 23.75) | 11.15 (-7.54 - 29.84) | 11.57 (-5.49 - 28.62) |
|  | Difference (Phm-Acu vs. UC) | 24.71 (13.59 - 35.82) | 19.72 (-5.54 - 44.97) | 13.54 (-4.13 - 31.21) |
|  | *P* value (Phm-Acu vs. Acu) | 0.027* | 0.353 | 0.251 |
|  | *P* value (Phm-Acu vs. UC) | <0.001*** | 0.157 | 0.168 |
| **VAS of arm pain** | Phm-Acu | 19.38 (12.04 - 26.73) | 22.49 ( 7.12 - 37.86) | 25.44 (11.34 - 39.54) |
|  | Acu | 26.94 (19.22 - 34.67) | 34.42 (19.15 - 49.68) | 36.72 (23.04 - 50.39) |
|  | UC | 41.67 (33.93 - 49.40) | 39.09 (24.72 - 53.46) | 33.90 (21.11 - 46.68) |
|  | Difference (Phm-Acu vs. Acu) | 7.56 (-4.85 - 19.97) | 11.93 (-9.69 - 33.54) | 11.28 ( -6.15 - 28.71) |
|  | Difference (Phm-Acu vs. UC) | 22.28 (10.18 - 34.39) | 16.61 (-9.37 - 42.58) | 8.46 (-11.54 - 28.45) |
|  | *P* value (Phm-Acu vs. Acu) | 0.335 | 0.422 | 0.287 |
|  | *P* value (Phm-Acu vs. UC) | <0.001*** | 0.296 | 0.674 |
| **NDI** | Phm-Acu | 19.20 (14.92 - 23.47) | 18.75 (13.95 - 23.54) | 17.22 (12.72 - 21.73) |
|  | Acu | 22.70 (18.19 - 27.21) | 20.75 (15.71 - 25.80) | 20.73 (15.99 - 25.47) |
|  | UC | 30.36 (25.83 - 34.89) | 28.94 (23.84 - 34.04) | 24.92 (20.14 - 29.70) |
|  | Difference (Phm-Acu vs. Acu) | 3.50 (-3.73 - 10.72) | 2.00 (-6.15 - 10.16) | 3.51 (-3.93 - 10.94) |
|  | Difference (Phm-Acu vs. UC) | 11.16 ( 3.97 - 18.35) | 10.19 ( 2.17 - 18.20) | 7.70 ( 0.15 - 15.24) |
|  | *P* value (Phm-Acu vs. Acu) | 0.544 | 1 | 0.569 |
|  | *P* value (Phm-Acu vs. UC) | 0.001** | 0.010** | 0.045* |
| **NPQ** | Phm-Acu | 23.70 (18.96 - 28.44) | 22.64 (17.34 - 27.93) | 21.12 (16.19 - 26.05) |
|  | Acu | 27.15 (22.26 - 32.04) | 25.41 (20.01 - 30.81) | 25.58 (20.31 - 30.86) |
|  | UC | 34.73 (29.73 - 39.74) | 33.97 (28.48 - 39.46) | 31.97 (26.80 - 37.14) |
|  | Difference (Phm-Acu vs. Acu) | 3.45 (-4.47 - 11.37) | 2.77 (-5.94 - 11.49) | 4.46 (-3.91 - 12.83) |
|  | Difference (Phm-Acu vs. UC) | 11.03 ( 2.99 - 19.07) | 11.33 ( 2.63 - 20.04) | 10.84 ( 2.64 - 19.05) |
|  | *P* value (Phm-Acu vs. Acu) | 0.646 | 0.94 | 0.454 |
|  | *P* value (Phm-Acu vs. UC) | 0.005** | 0.008** | 0.007** |
| **EQ-5D-5L** | Phm-Acu | 0.81 (0.78 - 0.85) | 0.83 (0.79 - 0.87) | 0.83 (0.79 - 0.87) |
|  | Acu | 0.79 (0.75 - 0.83) | 0.81 (0.77 - 0.85) | 0.79 (0.75 - 0.83) |
|  | UC | 0.76 (0.72 - 0.80) | 0.76 (0.71 - 0.80) | 0.77 (0.73 - 0.81) |
|  | Difference (Phm-Acu vs. Acu) | -0.03 (-0.09 - 0.04) | -0.02 (-0.08 - 0.04) | -0.04 (-0.10 - 0.02) |
|  | Difference (Phm-Acu vs. UC) | -0.06 (-0.12 - 0.00) | -0.07 (-0.14 - -0.01) | -0.06 (-0.12 - 0.01) |
|  | *P* value (Phm-Acu vs. Acu) | 0.705 | 0.893 | 0.29 |
|  | *P* value (Phm-Acu vs. UC) | 0.068 | 0.021* | 0.087 |
| **SF-12 (PCS)** | Phm-Acu | 49.21 (46.94 - 51.48) | 46.80 (44.42 - 49.18) | 47.86 (45.51 - 50.22) |
|  | Acu | 46.69 (44.27 - 49.11) | 47.44 (44.89 - 49.99) | 46.76 (44.27 - 49.26) |
|  | UC | 44.12 (41.74 - 46.50) | 42.89 (40.39 - 45.39) | 45.45 (42.95 - 47.95) |
|  | Difference (Phm-Acu vs. Acu) | -2.52 (-6.37 - 1.34) | 0.64 (-3.39 - 4.66) | -1.10 (-5.09 - 2.90) |
|  | Difference (Phm-Acu vs. UC) | -5.09 (-8.93 - -1.25) | -3.91 (-7.88 - 0.05) | -2.41 (-6.36 - 1.53) |
|  | *P* value (Phm-Acu vs. Acu) | 0.279 | 1 | 1 |
|  | *P* value (Phm-Acu vs. UC) | 0.007** | 0.054 | 0.332 |
| **SF-12 (MCS)** | Phm-Acu | 50.00 (46.97 - 53.02) | 51.76 (48.65 - 54.86) | 52.10 (48.97 - 55.24) |
|  | Acu | 47.95 (44.52 - 51.37) | 49.08 (45.92 - 52.23) | 49.11 (45.95 - 52.27) |
|  | UC | 49.18 (45.95 - 52.42) | 48.56 (45.28 - 51.83) | 49.27 (45.89 - 52.65) |
|  | Difference (Phm-Acu vs. Acu) | -2.05 (-7.31 - 3.21) | -2.68 (-7.84 - 2.48) | -2.99 (-8.10 - 2.12) |
|  | Difference (Phm-Acu vs. UC) | -0.81 (-5.90 - 4.28) | -3.20 (-8.35 - 1.95) | -2.83 (-8.11 - 2.45) |
|  | *P* value (Phm-Acu vs. Acu) | 0.752 | 0.479 | 0.37 |
|  | *P* value (Phm-Acu vs. UC) | 1 | 0.319 | 0.448 |
| **PGIC** | Phm-Acu | 2.00 (1.70 - 2.30) | 2.35 (2.00 - 2.70) | 2.24 (1.89 - 2.59) |
|  | Acu | 2.72 (2.40 - 3.05) | 2.91 (2.55 - 3.27) | 3.04 (2.67 - 3.42) |
|  | UC | 3.02 (2.70 - 3.35) | 3.35 (2.98 - 3.72) | 3.00 (2.62 - 3.37) |
|  | Difference (Phm-Acu vs. Acu) | 0.72 (0.22 - 1.23) | 0.56 (-0.01 - 1.14 ) | 0.80 (0.22 - 1.38) |
|  | Difference (Phm-Acu vs. UC) | 1.02 (0.51 - 1.54) | 1.00 (0.42 - 1.58) | 0.75 (0.17 - 1.34) |
|  | *P* value (Phm-Acu vs. Acu) | 0.003** | 0.057 | 0.004** |
|  | *P* value (Phm-Acu vs. UC) | <0.001*** | <0.001*** | 0.009** |

Between-group differences were analyzed by analysis of covariance with adjustments for the baseline values, except the patient's global impression of change. The primary endpoint was the outcome at week 7. Missing values were added through multiple imputation. Estimates for each group, and between-group differences, in the decrease at each time point are displayed with the 95% confidence intervals (CIs). The NRS, VAS, EQ-5D-5L, SF-12, and PGIC were measured as scores. The NDI and NPQ were calculated as percentages. *P <.05, **P <.01, ***P <.001. The p-values were adjusted using the Bonferroni correction.

***ANCOVA***, analysis of covariance; ***Phm-Acu***, pharmacopuncture; ***Acu,*** acupuncture; ***UC,*** usual care (medication & physiotherapy); ***NRS,*** numeric rating scale; ***VAS,*** visual-analogue scale; ***NDI,*** *n*eck disability index; ***NPQ,*** Northwick Park questionnaire; ***EQ-5D***-***5L,*** EuroQol 5-dimension 5-level instrument; ***SF-12,*** 12-item short form health survey; ***PCS,*** physical component summary; ***MCS,*** mental component summary; ***PGIC,*** patient global impression of change.

**Supplementary Table 4.** Primary and secondary outcomes after treatment (ANCOVA, LOCF)

|  |  | Week 7 | Week 13 | Week 25 |
| --- | --- | --- | --- | --- |
| **NRS of neck pain** | Phm-Acu | 2.41 (1.81 - 3.01) | 2.45 (1.80 - 3.09) | 2.44 (1.75 - 3.13) |
|  | Acu | 4.07 (3.48 - 4.67) | 4.30 (3.67 - 4.94) | 4.13 (3.44 - 4.81) |
|  | UC | 5.11 (4.49 - 5.74) | 5.24 (4.58 - 5.91) | 4.68 (3.96 - 5.39) |
|  | Difference (Phm-Acu vs. Acu) | 1.66 (0.68 - 2.65) | 1.86 (0.80 - 2.91) | 1.69 (0.56 - 2.82) |
|  | Difference (Phm-Acu vs. UC) | 2.70 (1.70 - 3.71) | 2.79 (1.72 - 3.86) | 2.24 (1.09 - 3.39) |
|  | *P* value (Phm-Acu vs. Acu) | <0.001*** | <0.001*** | 0.002** |
|  | *P* value (Phm-Acu vs. UC) | <0.001*** | <0.001*** | <0.001*** |
| **NRS of arm pain** | Phm-Acu | 1.81 (1.10 - 2.51) | 1.53 (0.84 - 2.23) | 1.69 (0.97 - 2.41) |
|  | Acu | 2.84 (2.13 - 3.55) | 3.28 (2.59 - 3.98) | 3.64 (2.92 - 4.37) |
|  | UC | 4.32 (3.58 - 5.06) | 4.78 (4.05 - 5.51) | 3.66 (2.90 - 4.42) |
|  | Difference (Phm-Acu vs. Acu) | 1.03 (-0.12 - 2.19) | 1.75 (0.62 - 2.88) | 1.95 (0.77 - 3.13) |
|  | Difference (Phm-Acu vs. UC) | 2.51 ( 1.34 - 3.69) | 3.25 (2.09 - 4.40) | 1.97 (0.77 - 3.17) |
|  | *P* value (Phm-Acu vs. Acu) | 0.088 | 0.001** | <0.001*** |
|  | *P* value (Phm-Acu vs. UC) | <0.001*** | <0.001*** | <0.001*** |
| **VAS of neck pain** | Phm-Acu | 23.95 (17.69 - 30.22) | 23.54 (17.32 - 29.77) | 22.38 (16.27 - 28.49) |
|  | Acu | 39.21 (32.97 - 45.45) | 38.70 (32.50 - 44.90) | 38.86 (32.77 - 44.94) |
|  | UC | 50.43 (43.88 - 56.98) | 50.96 (44.45 - 57.47) | 48.12 (41.73 - 54.51) |
|  | Difference (Phm-Acu vs. Acu) | 15.26 ( 5.02 - 25.49) | 15.16 ( 4.99 - 25.33) | 16.48 ( 6.50 - 26.46) |
|  | Difference (Phm-Acu vs. UC) | 26.48 (16.05 - 36.90) | 27.42 (17.06 - 37.78) | 25.74 (15.57 - 35.91) |
|  | *P* value (Phm-Acu vs. Acu) | 0.002** | 0.002** | <0.001*** |
|  | *P* value (Phm-Acu vs. UC) | <0.001*** | <0.001*** | <0.001*** |
| **VAS of arm pain** | Phm-Acu | 18.33 (11.49 to 25.16) | 16.55 ( 9.99 to 23.11) | 16.50 ( 9.31 to 23.68) |
|  | Acu | 28.20 (21.35 to 35.06) | 31.49 (24.91 to 38.08) | 33.76 (26.55 to 40.98) |
|  | UC | 42.29 (35.10 to 49.48) | 43.06 (36.16 to 49.97) | 38.32 (30.76 to 45.89) |
|  | Difference (Phm-Acu vs. Acu) | 9.88 (-1.30 to 21.05) | 14.94 ( 4.21 to 25.67) | 17.27 (5.52 to 29.02) |
|  | Difference (Phm-Acu vs. UC) | 23.96 (12.60 to 35.33) | 26.51 (15.59 to 37.42) | 21.82 (9.87 to 33.78) |
|  | *P* value (Phm-Acu vs. Acu) | 0.094 | 0.004** | 0.002** |
|  | *P* value (Phm-Acu vs. UC) | <0.001*** | <0.001*** | <0.001*** |
| **NDI** | Phm-Acu | 19.50 (15.12 - 23.87) | 19.06 (14.28 - 23.84) | 17.68 (13.05 - 22.30) |
|  | Acu | 25.15 (20.78 - 29.51) | 22.16 (17.39 - 26.93) | 22.45 (17.84 - 27.06) |
|  | UC | 31.22 (26.63 - 35.81) | 29.41 (24.39 - 34.42) | 25.69 (20.83 - 30.54) |
|  | Difference (Phm-Acu vs. Acu) | 5.65 (-1.48 - 12.78) | 3.10 (-4.70 - 10.90) | 4.77 (-2.77 - 12.31) |
|  | Difference (Phm-Acu vs. UC) | 11.73 ( 4.44 - 19.02) | 10.35 ( 2.38 - 18.32) | 8.01 ( 0.30 - 15.71) |
|  | *P* value (Phm-Acu vs. Acu) | 0.148 | 0.733 | 0.304 |
|  | *P* value (Phm-Acu vs. UC) | <0.001*** | 0.008** | 0.040* |
| **NPQ** | Phm-Acu | 24.03 (19.27 - 28.79) | 22.80 (17.63 - 27.97) | 21.53 (16.60 - 26.45) |
|  | Acu | 30.45 (25.71 - 35.18) | 27.28 (22.14 - 32.42) | 26.82 (21.92 - 31.72) |
|  | UC | 35.24 (30.23 - 40.24) | 34.22 (28.79 - 39.64) | 32.09 (26.92 - 37.27) |
|  | Difference (Phm-Acu vs. Acu) | 6.42 (-1.33 - 14.16) | 4.48 (-3.91 - 12.88) | 5.29 (-2.72 - 13.30) |
|  | Difference (Phm-Acu vs. UC) | 11.21 ( 3.25 - 19.16) | 11.42 ( 2.79 - 20.04) | 10.57 ( 2.34 - 18.79) |
|  | *P* value (Phm-Acu vs. Acu) | 0.124 | 0.452 | 0.271 |
|  | *P* value (Phm-Acu vs. UC) | 0.004** | 0.007** | 0.009** |
| **EQ-5D-5L** | Phm-Acu | 0.82 (0.78 - 0.85) | 0.83 (0.80 - 0.87) | 0.83 (0.79 - 0.87) |
|  | Acu | 0.78 (0.74 - 0.81) | 0.80 (0.77 - 0.84) | 0.79 (0.75 - 0.82) |
|  | UC | 0.75 (0.71 - 0.79) | 0.75 (0.71 - 0.79) | 0.77 (0.73 - 0.80) |
|  | Difference (Phm-Acu vs. Acu) | -0.04 (-0.10 - 0.02) | -0.03 (-0.09 - 0.03) | -0.04 (-0.10 - 0.01) |
|  | Difference (Phm-Acu vs. UC) | -0.06 (-0.12 - 0.00) | -0.08 (-0.14 - -0.02) | -0.06 (-0.12 - 0.00) |
|  | *P* value (Phm-Acu vs. Acu) | 0.282 | 0.472 | 0.161 |
|  | *P* value (Phm-Acu vs. UC) | 0.036* | 0.005** | 0.037* |
| **SF-12 (PCS)** | Phm-Acu | 49.04 (46.85 - 51.24) | 46.63 (44.34 - 48.92) | 47.53 (45.24 - 49.82) |
|  | Acu | 45.78 (43.59 - 47.98) | 46.65 (44.36 - 48.93) | 45.81 (43.53 - 48.10) |
|  | UC | 43.95 (41.64 - 46.27) | 42.72 (40.31 - 45.14) | 45.26 (42.85 - 47.67) |
|  | Difference (Phm-Acu vs. Acu) | -3.26 (-6.82 - 0.31) | 0.02 (-3.70 - 3.74) | -1.72 (-5.44 - 2.00) |
|  | Difference (Phm-Acu vs. UC) | -5.09 (-8.75 - -1.42) | -3.90 (-7.73 - -0.08) | -2.27 (-6.10 - 1.55) |
|  | *P* value (Phm-Acu vs. Acu) | 0.08 | 1 | 0.587 |
|  | *P* value (Phm-Acu vs. UC) | 0.004** | 0.044* | 0.356 |
| **SF-12 (MCS)** | Phm-Acu | 50.36 (47.55 - 53.18) | 52.27 (49.46 - 55.09) | 52.55 (49.58 - 55.51) |
|  | Acu | 47.92 (45.09 - 50.74) | 49.17 (46.34 - 51.99) | 49.22 (46.24 - 52.20) |
|  | UC | 48.74 (45.73 - 51.74) | 48.03 (45.03 - 51.04) | 48.96 (45.80 - 52.12) |
|  | Difference (Phm-Acu vs. Acu) | -2.45 (-7.01 - 2.12) | -3.11 (-7.68 - 1.46) | -3.33 (-8.15 - 1.49) |
|  | Difference (Phm-Acu vs. UC) | -1.63 (-6.36 - 3.11) | -4.24 (-8.99 - 0.50) | -3.59 (-8.58 - 1.40) |
|  | *P* value (Phm-Acu vs. Acu) | 0.45 | 0.249 | 0.236 |
|  | *P* value (Phm-Acu vs. UC) | 0.87 | 0.088 | 0.209 |
| **PGIC** | Phm-Acu | 1.96 (1.69 - 2.23) | 2.31 (1.99 - 2.63) | 2.24 (1.91 - 2.57) |
|  | Acu | 2.73 (2.46 - 3.00) | 2.91 (2.59 - 3.24) | 3.05 (2.72 - 3.38) |
|  | UC | 3.04 (2.76 - 3.32) | 3.35 (3.01 - 3.69) | 3.00 (2.65 - 3.35) |
|  | Difference (Phm-Acu vs. Acu) | 0.77 (0.33 - 1.20) | 0.60 (0.08 - 1.13) | 0.81 (0.27 - 1.35) |
|  | Difference (Phm-Acu vs. UC) | 1.08 (0.63 - 1.53 ) | 1.04 (0.50 - 1.58) | 0.76 (0.21 - 1.32) |
|  | *P* value (Phm-Acu vs. Acu) | <0.001*** | 0.021* | 0.002** |
|  | *P* value (Phm-Acu vs. UC) | <0.001*** | <0.001*** | 0.005** |

Between-group differences were analyzed via analysis of covariance with adjustments for the baseline values, except the patient's global impression of change. The primary endpoint was the outcome at week 7. Missing values were added through LOCF. Estimates for each group, and between-group differences, in the decrease at each time point are displayed with the 95% confidence intervals (CIs). The NRS, VAS, EQ-5D-5L, SF-12, and PGIC were measured as scores. The NDI and NPQ were calculated as percentages. *P <.05, **P <.01, ***P <.001. The p-values were adjusted using the Bonferroni correction.

***ANCOVA***, analysis of covariance; ***LOCF,*** last observation carried forward; ***Phm-Acu***, pharmacopuncture; ***Acu,*** acupuncture; ***UC,*** usual care (medication & physiotherapy); ***NRS,*** numeric rating scale; ***VAS,*** visual-analogue scale; ***NDI,*** *n*eck disability index; ***NPQ,*** Northwick Park questionnaire; ***EQ-5D***-***5L,*** EuroQol 5-dimension 5-level instrument; ***SF-12,*** 12-item short form health survey; ***PCS,*** physical component summary; ***MCS,*** mental component summary; ***PGIC,*** patient global impression of change.

**Supplementary Table 5.** Areas under the curves of outcomes at 25 weeks

|  | Phm-Acu | Acu | UC | Difference 1*  Difference 2† | *P* value 1*  *P* value 2† |
| --- | --- | --- | --- | --- | --- |
| NRS of neck pain | 71.11  ( 58.42 , 83.80) | 102.30  ( 89.29 , 115.30) | 122.37  (109.09 , 135.65) | -31.19  (-52.38, -9.99)  -51.26  (-72.56, -29.96) | 0.002**  <0.001*** |
| NRS of arm pain | 51.78  (38.03 , 65.54) | 79.48  (65.40 , 93.56) | 105.43  (90.92 , 119.94) | -27.69  (-50.52, -4.87)  -53.65  (-76.57, -30.73) | 0.014*  <0.001*** |
| VAS of neck pain | 749.22  (589.09 , 909.36) | 990.60  (828.89 , 1152.32) | 1155.52  (979.64 , 1331.40) | -241.38  (-469.06, -13.70)  -406.30  (-682.30, -130.30) | 0.035*  0.002** |
| VAS of arm pain | 626.98  (444.29 , 809.67) | 841.65  (671.66 , 1011.63) | 968.86  (806.92 , 1130.80) | -214.66  (-479.51, 50.19)  -341.88  (-632.82 , -50.94) | 0.136  0.018* |
| NDI | 516.21  (432.46 , 599.97) | 576.28  (487.80 , 664.76) | 721.03  (632.72 , 809.35) | -60.06  (-201.18 , 81.06)  -204.82  (-344.46 , -65.18) | 0.668  0.002** |
| NPQ | 615.78  (525.30 , 706.26) | 688.17 (595.57 , 780.77) | 849.04  (754.28 , 943.79) | -72.39  (-221.99 , 77.21)  -233.26  (-383.84 , -82.67) | 0.545  <0.001*** |
| EQ-5D-5L | 19.35  (18.71 , 19.99) | 18.77  (18.11 , 19.43) | 17.98  (17.29 , 18.67) | 0.58  (-0.46, 1.62)  1.37  (0.29, 2.46) | 0.407  0.010* |
| SF-12 (PCS) | 1125.18  (1085.26 , 1165.11) | 1109.21  (1068.00 , 1150.43) | 1044.97  (1003.34 , 1086.60) | 15.97  (-50.61, 82.55)  80.22  (14.12, 146.32) | 1.000  0.014* |
| SF-12 (MCS) | 1212.22  (1155.70, 1268.73) | 1157.85  (1100.44 , 1215.26) | 1161.55  (1101.37, 1221.72) | 54.37  (-39.00, 147.74)  50.67  (-43.74, 145.08) | 0.374  0.448 |
| The area under the curve (AUC) was calculated using the trapezoidal rule. Between-group differences were analyzed using independent *t*-tests. Missing values were added through multiple imputation. The area under the curve estimates in each group, and between-group differences, are presented with the 95% confidence intervals (CIs). *P <.05, **P <.01, ***P <.001. The p-values were adjusted using the Bonferroni correction.  *Difference 1, *P* value 1: Phm-Acu vs. Acu, †Difference 2, *P* value 2: Phm-Acu vs. UC  ***Phm-Acu***, pharmacopuncture; ***Acu,*** acupuncture; ***UC,*** usual care (medication & physiotherapy); ***NRS,*** numeric rating scale; ***VAS,*** visual-analogue scale; ***NDI,*** *n*eck disability index; ***NPQ,*** Northwick Park questionnaire; ***EQ-5D***-***5L,*** EuroQol 5-dimension 5-level instrument; ***SF-12,*** 12-item short form health survey; ***PCS,*** physical component summary; ***MCS,*** mental component summary. | | | | | |

**Supplementary Table 6.** Survival analysis (Cox-regression)

|  | **HR (95% CI)** | **p-value** |
| --- | --- | --- |
| **Group (ref. Phm-Acu)** |  |  |
| Acu | 0.454 (0.244-0.843) | 0.013 |
| UC | 0.274 (0.141-0.533) | <0.001 |
| Baseline: NRS of Neck pain | 1.262 (0.937-1.700) | 0.123 |
| A survival analysis based on patient recovery (a decrease of NRS 2 of neck pain [MCID] from baseline). Reference: Phm-Acu group.  HR, hazard ratio; Phm-Acu, pharmacopuncture; Acu, acupuncture; UC, usual care (medication & physiotherapy); NRS, Numeric Rating Scale | | |

**Supplementary Table 7.** Summary of treatment-related adverse events

| Adverse events | Phm-Acu (n=28) | | Acu (n=27) | | UC (n=25) | |
| --- | --- | --- | --- | --- | --- | --- |
| Feeling feverish | | 1 | | 0 | | 0 |
| Fatigue | | 0 | | 1 | | 0 |
| Localized itching | | 3 | | 0 | | 0 |
| Localized redness | | 1 | | 0 | | 0 |
| ***Phm-Acu***, pharmacopuncture; ***Acu,*** acupuncture; ***UC,*** usual care (medication & physiotherapy) | | | | | | |

**Supplementary Figure 1.** An example of a procedural image for pharmacopouncture therapy


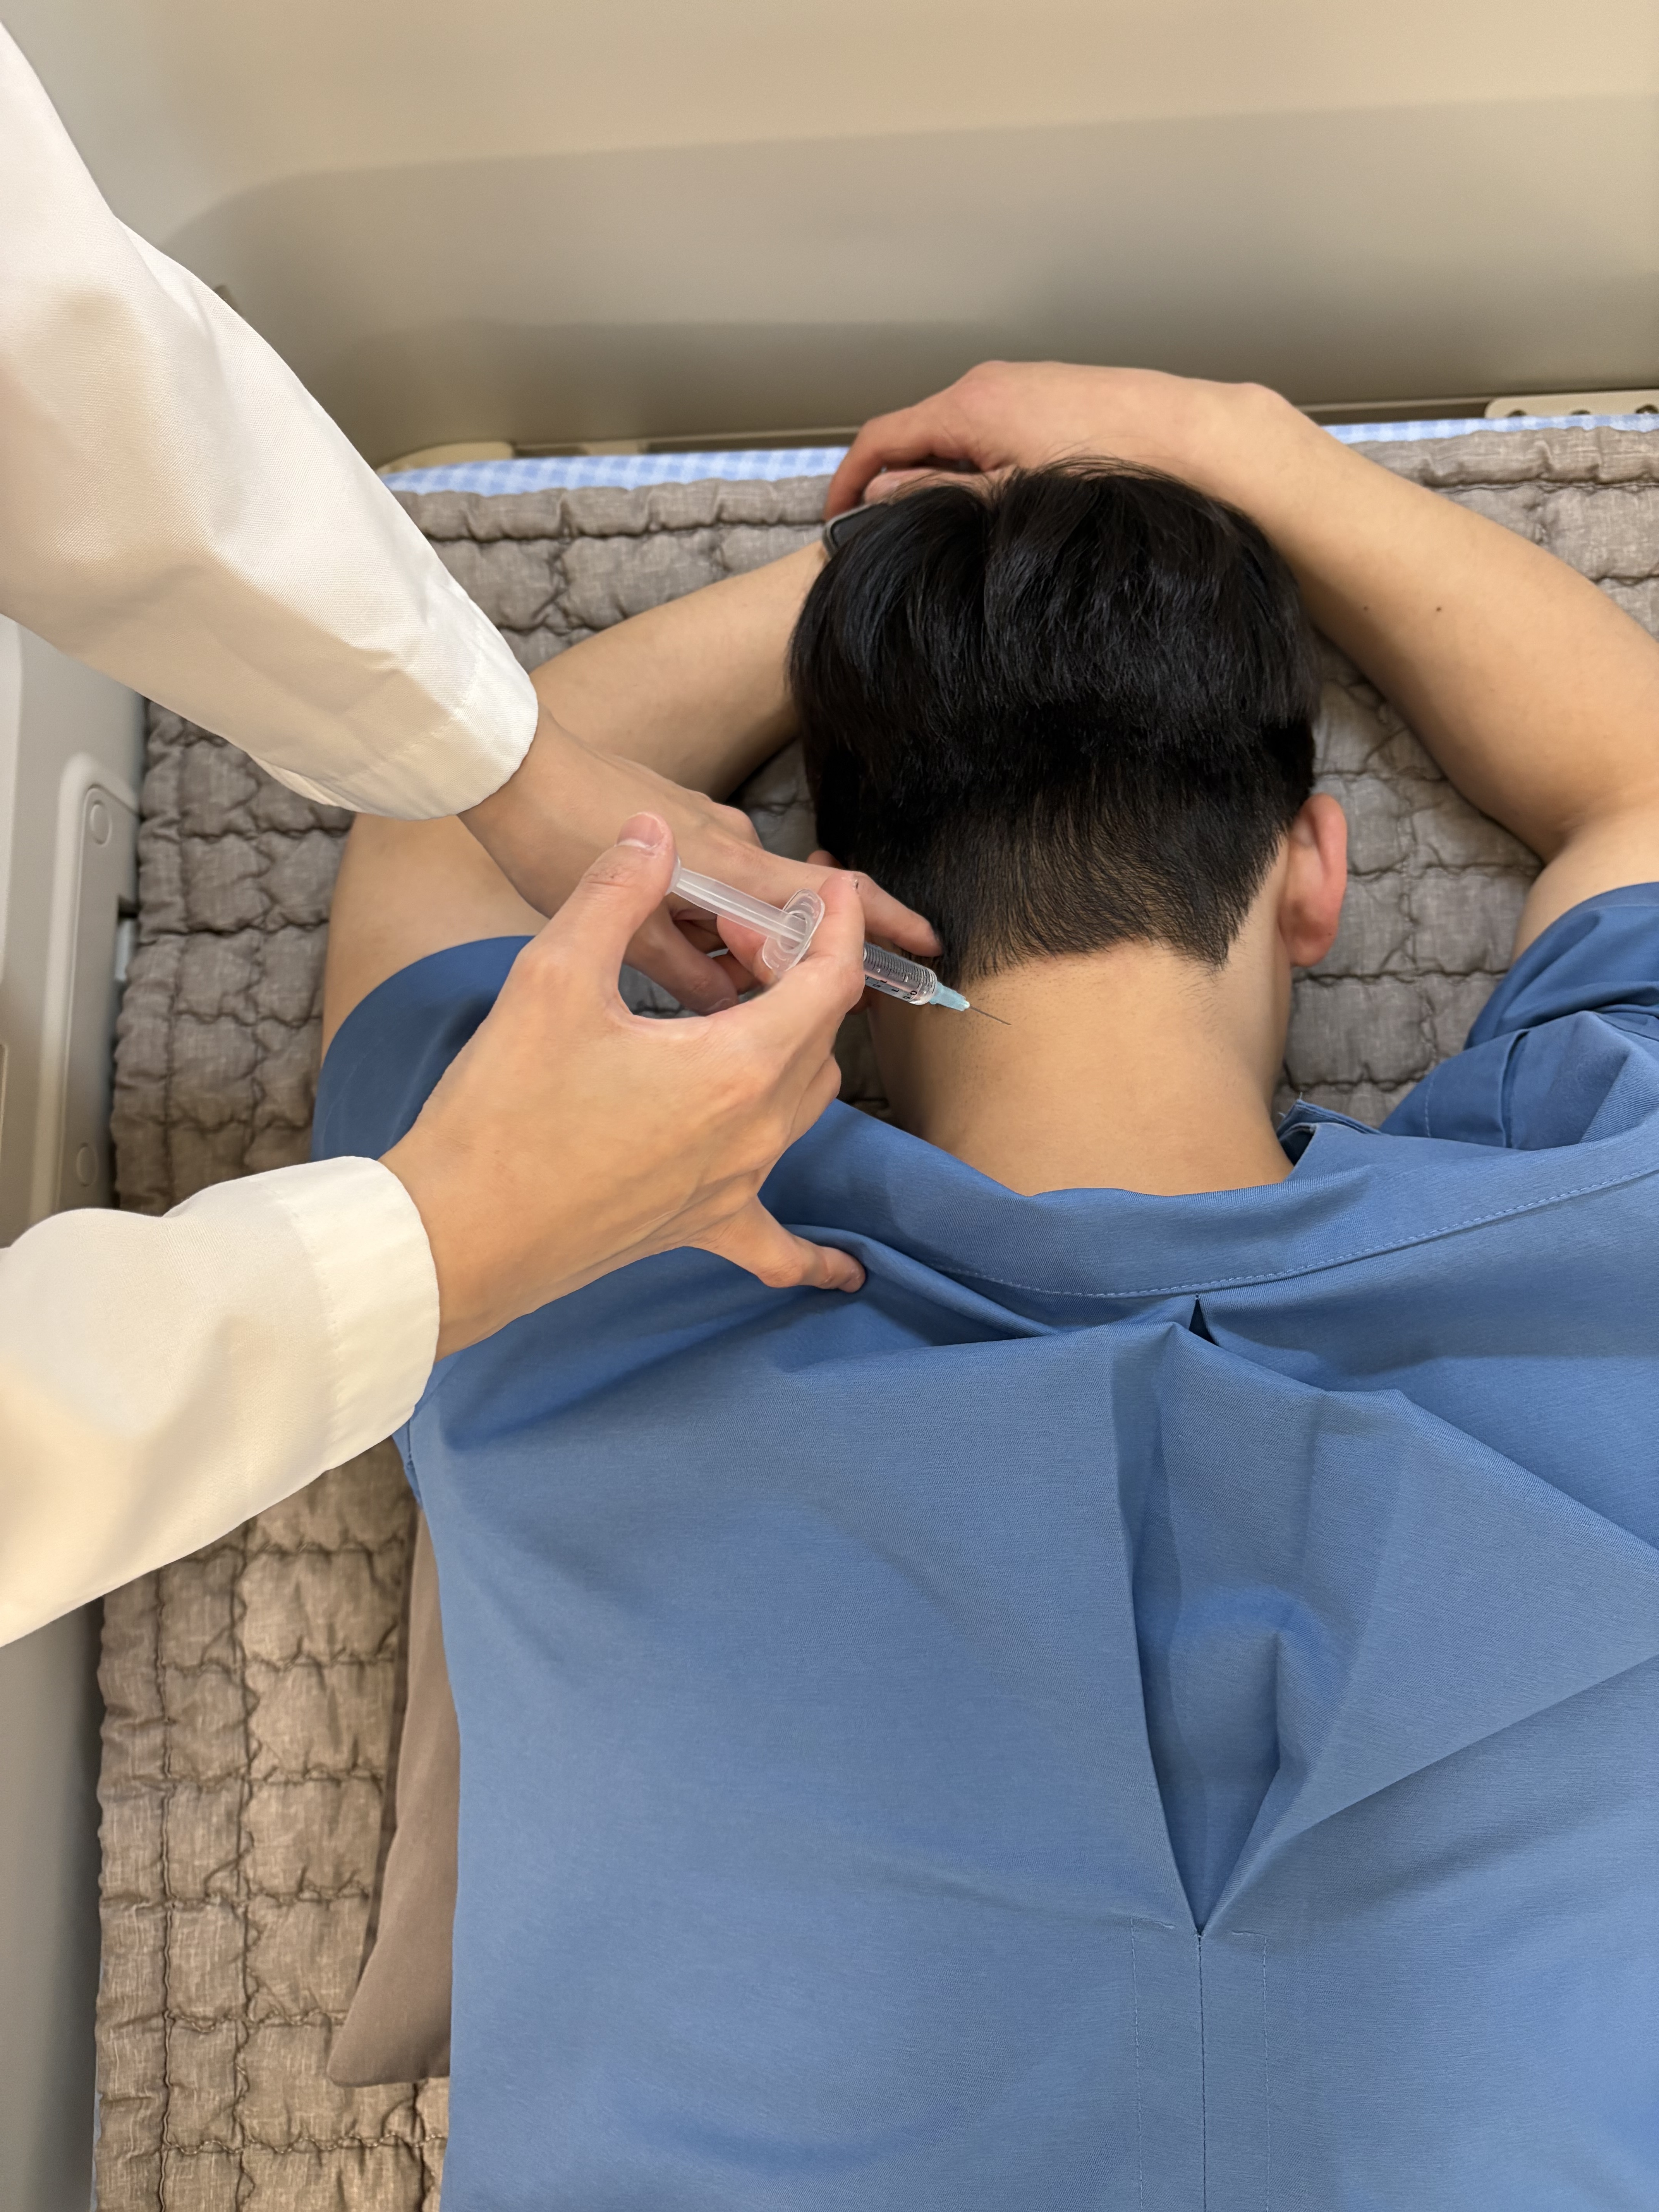

Supplement: Supplementary file 1 [file Supplementary%20File_CDH%252CPhm_0623_1.docx]
